# Supplementary material
Source: publisher site journal article supplement (https://www.dovepress.com/article/274608)

Supplementary Materials

**Supplementary table** Complications

| **MedDRA Preferred Term, n (%)a** | **Working Ability Recovered**  **N = 122** | **Working Ability**  **Not Recovered**  **N = 91** |
| --- | --- | --- |
| Hypertension | 2 (1.6) | 5 (5.5) |
| Essential hypertension | 1 (0.8) | 2 (2.2) |
| Sleep disorder | 0 | 3 (3.3) |
| Asthma | 1 (0.8) | 1 (1.1) |
| Gastrooesophageal reflux disease | 2 (1.6) | 0 |
| Panic disorder | 2 (1.6) | 0 |
| Rheumatoid arthritis | 1 (0.8) | 1 (1.1) |
| Anal prolapse | 0 | 1 (1.1) |
| Anxiety disorder | 0 | 1 (1.1) |
| Arrhythmia | 1 (0.8) | 0 |
| Autonomic nervous system imbalance | 0 | 1 (1.1) |
| Cerebral infarction | 0 | 1 (1.1) |
| Cervicobrachial syndrome | 1 (0.8) | 0 |
| Chloasma | 0 | 1 (1.1) |
| Constipation | 0 | 1 (1.1) |
| Dermatitis atopic | 0 | 1 (1.1) |
| Diabetes mellitus | 0 | 1 (1.1) |
| Dyslipidaemia | 0 | 1 (1.1) |
| Glaucoma | 0 | 1 (1.1) |
| Hepatic steatosis | 0 | 1 (1.1) |
| Ligament rupture | 0 | 1 (1.1) |
| Menopausal symptoms | 1 (0.8) | 0 |
| Menstruation irregular | 0 | 1 (1.1) |
| Migraine | 1 (0.8) | 0 |
| Rhinitis allergic | 0 | 1 (1.1) |
| Seasonal allergy | 1 (0.8) | 0 |
| Sleep apnoea syndrome | 0 | 1 (1.1) |
| Thyroid neoplasm | 0 | 1 (1.1) |

aMedDRA version 18.1.

If patients had multiple complications, all complications were counted separately.

Abbreviation: MedDRA, Medical Dictionary for Regulatory Activities.

**Supplementary Figure 1** Time course of effectiveness outcome measures for the 12-week treatment period by working ability. (a) HAM-D17 total score; (b) HAM-D17 core score; (c) HAM-D17 insomnia score; (d) HAM-D17 anxiety score; (e) HAM-D17 somatic score; (f) BPI-SF; (g) SASS; (h) GAF; (i) EQ-5D.

**Notes:** The means and standard deviations are shown for the time points at baseline and Weeks 2, 4, 8, and 12. **p<0.01, *p<0.05, comparison between the working ability recovered group and the working ability not recovered group using Welch's *t*-test for means of each outcome measure.

**Abbreviations:** BPI-SF, Brief Pain Inventory-Short Form; EQ-5D, EuroQol-5 Dimensions questionnaire for quality of life; GAF, Global Assessment of Functioning; HAM-D17, 17-item Hamilton Rating Scale for Depression; SASS, Social Adaptation Self-evaluation Scale.


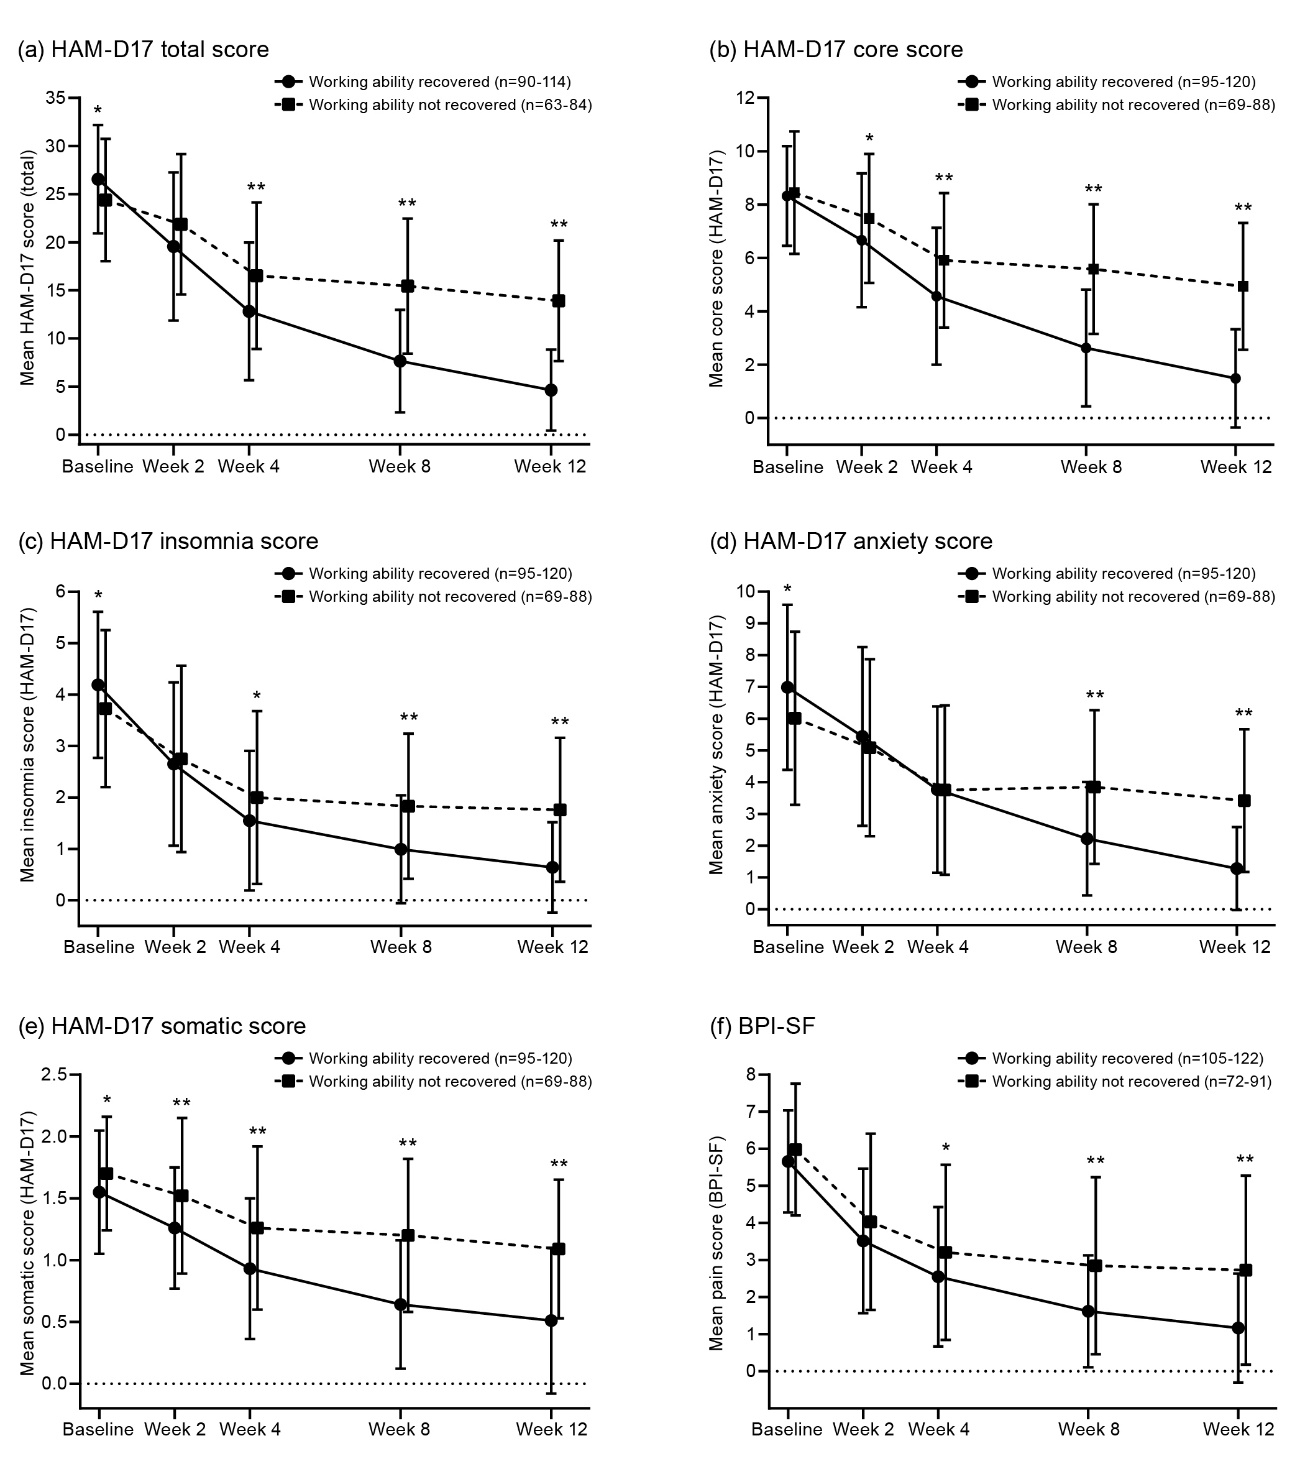

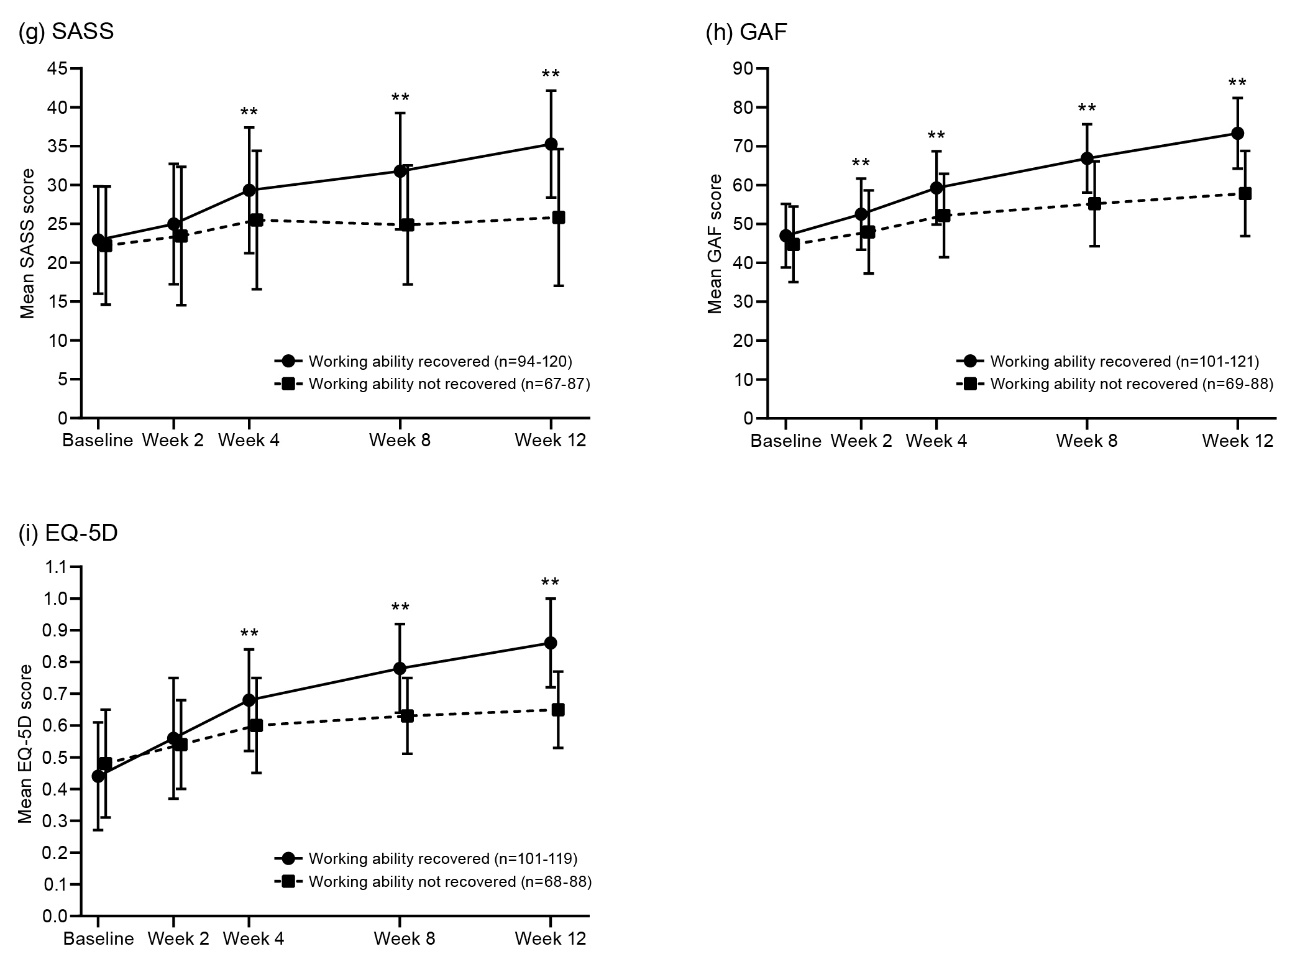


**Supplementary Figure 2** Time course of effectiveness outcome measures for the 12-week treatment period between groups by working ability and depressive episodes. (a) HAM-D17 total score; (b) HAM-D17 core score; (c) HAM-D17 insomnia score; (d) HAM-D17 anxiety score; (e) HAM-D17 somatic score; (f) BPI-SF; (g) SASS; (h) GAF; (i) EQ-5D.

**Notes:** The means and standard deviations are shown for the time points at baseline and Weeks 2, 4, 8, and 12. **p<0.01, *p<0.05, comparison between groups by working ability and depressive episodes using Welch's t-test for means of each outcome measure.

**Abbreviations:** BPI-SF, Brief Pain Inventory-Short Form; EQ-5D, EuroQol-5 Dimensions questionnaire for quality of life; GAF, Global Assessment of Functioning; HAM-D17, 17-item Hamilton Rating Scale for Depression; SASS, Social Adaptation Self-evaluation Scale.


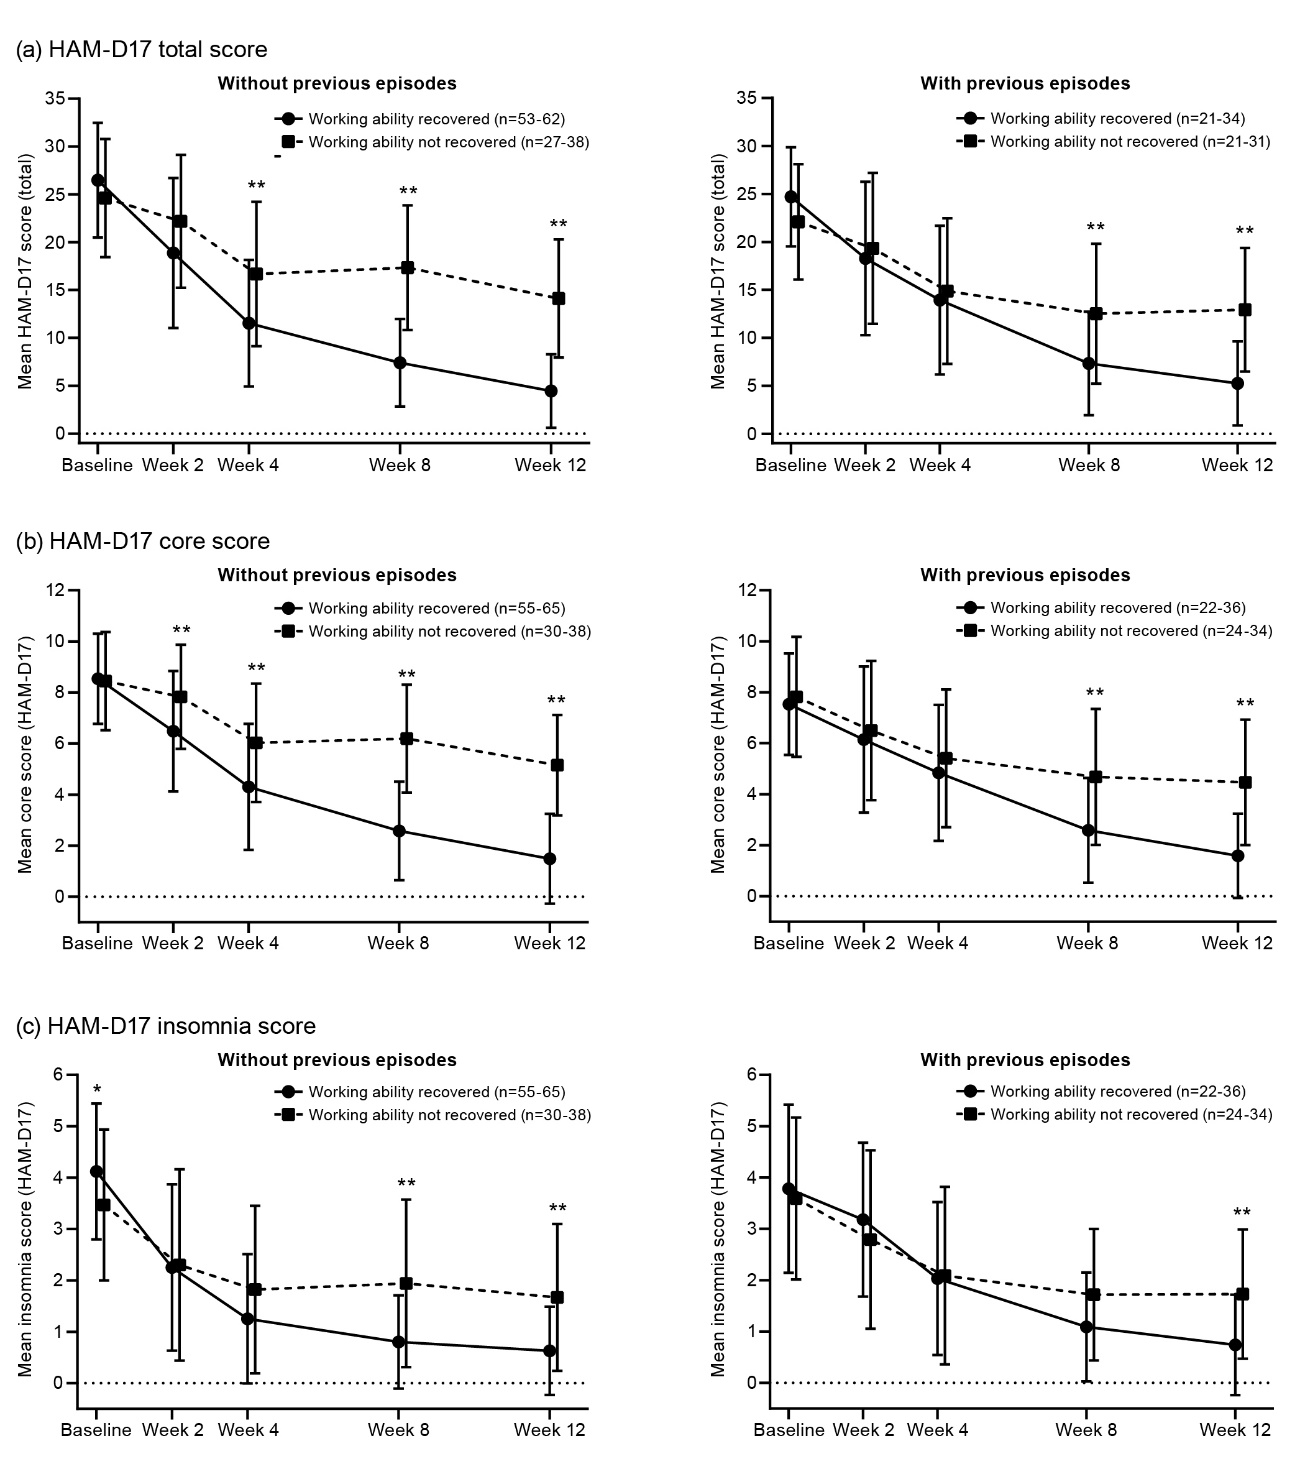

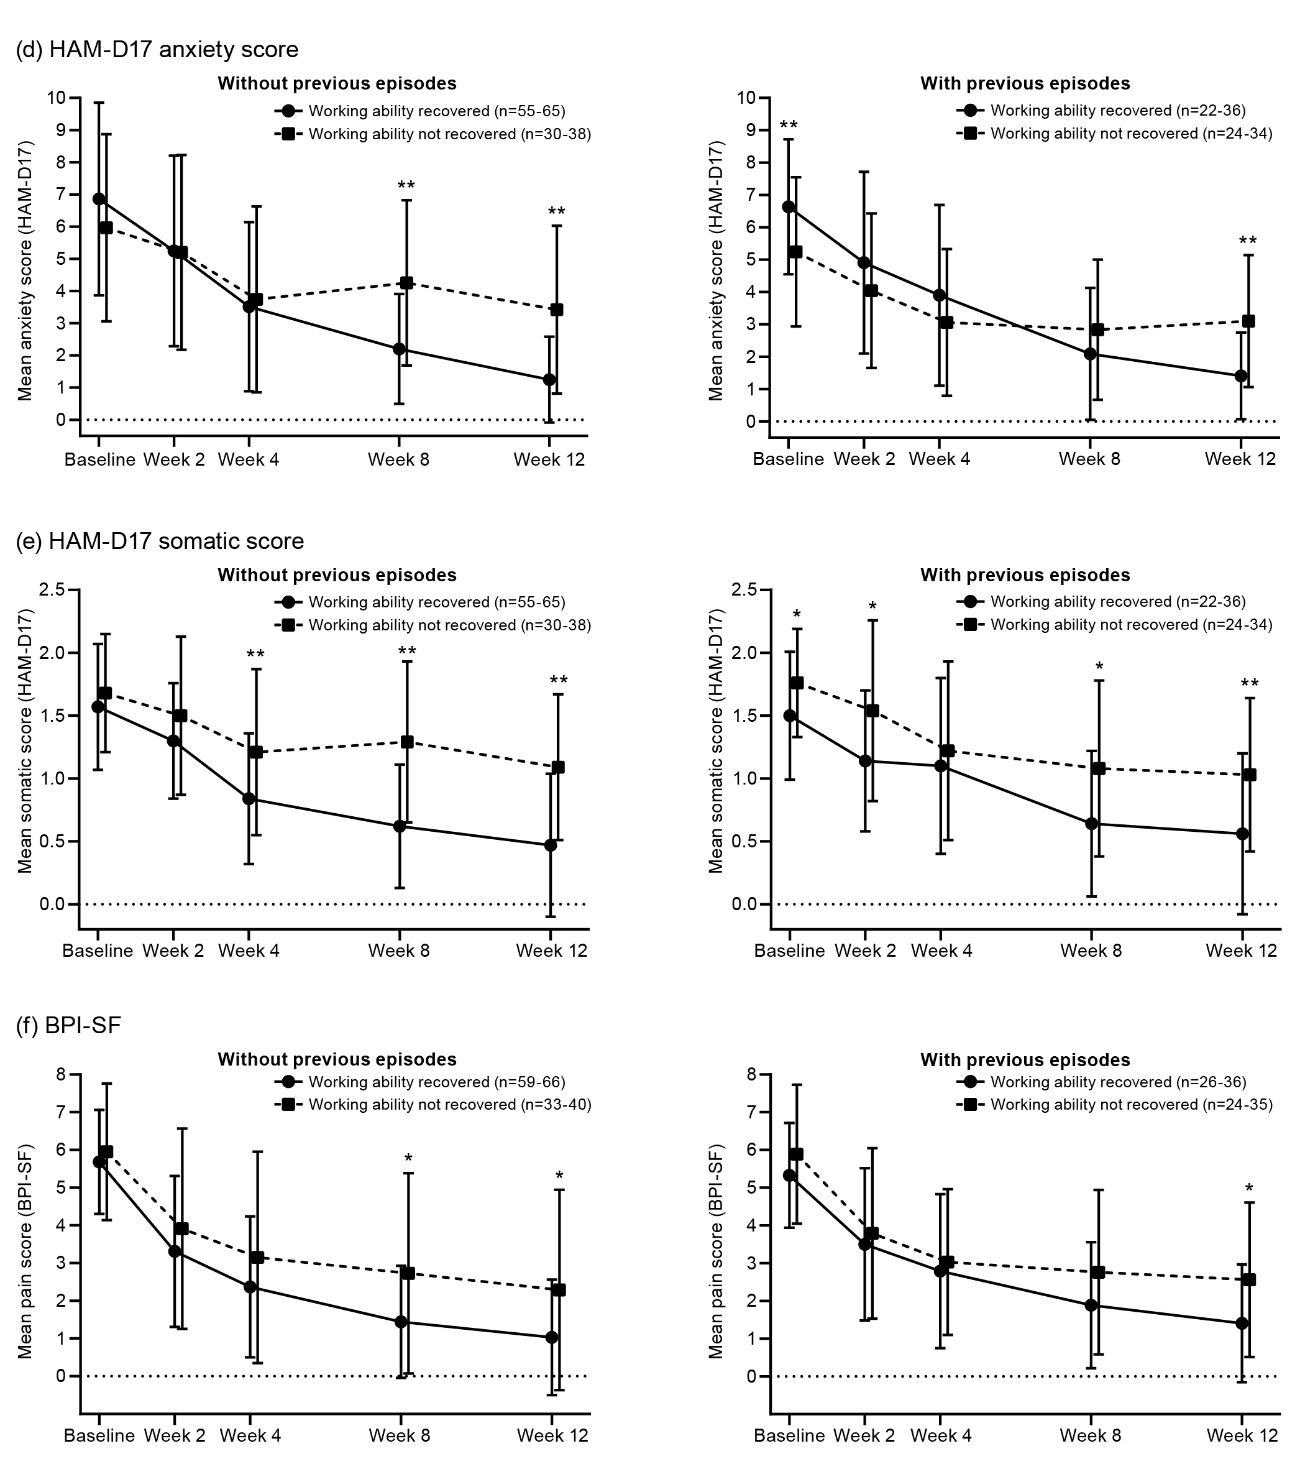

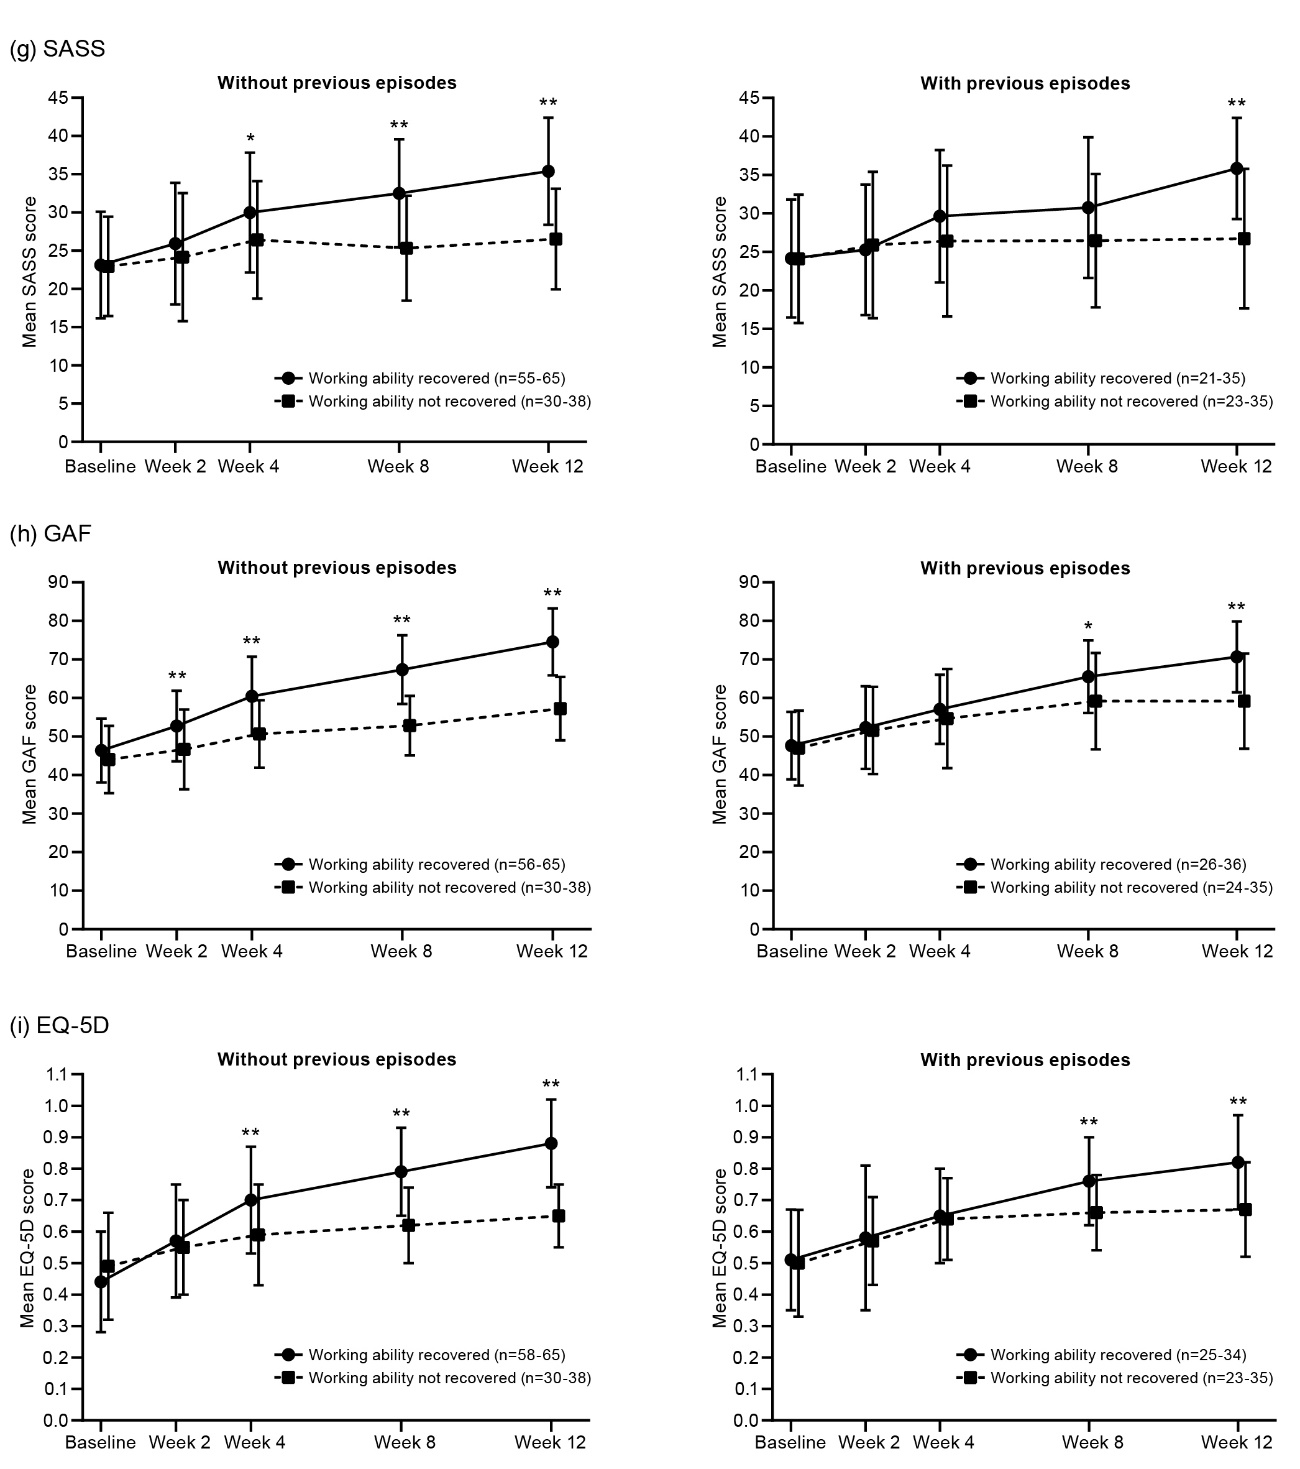

Supplement: Supplementary file 1 [file get_supplementary_file.php]
